# Supplementary material for: Biofilm modelling on the contact lenses and comparison of the in vitro activities of multipurpose lens solutions and antibiotics
Source: PeerJ journal article supplement (doi:10.7717/peerj.9419), 2020-06-24

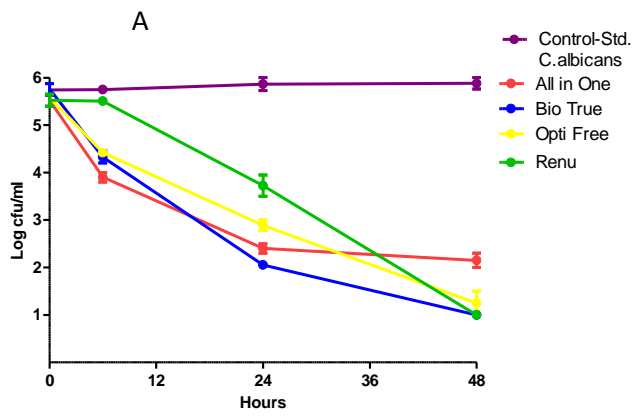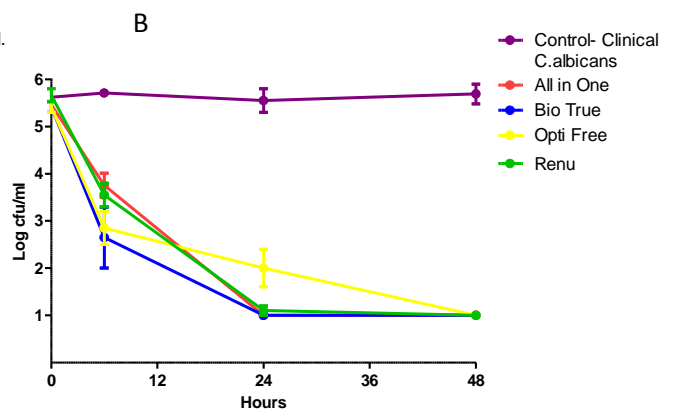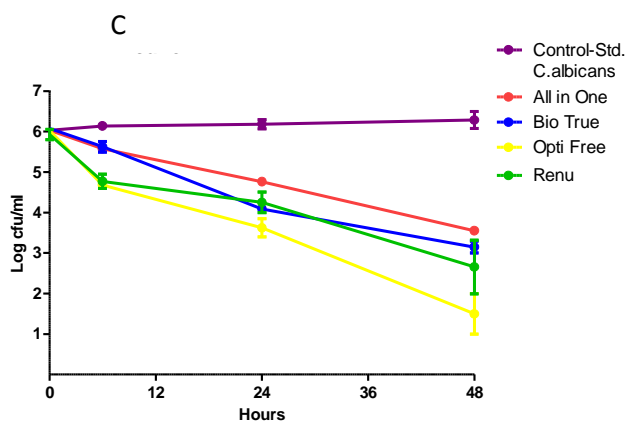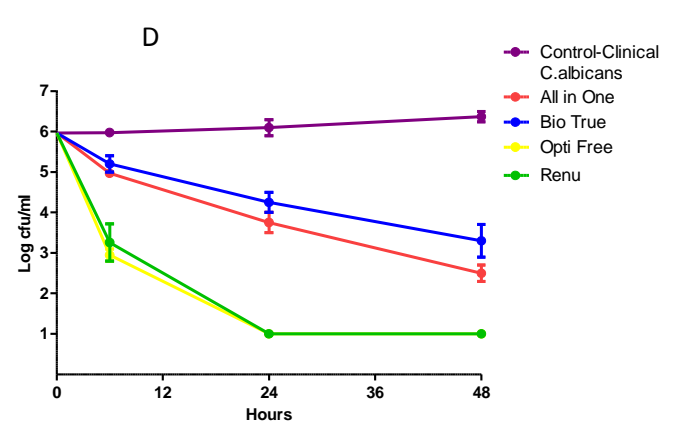

Supplement: Figure_S5-C._albicans....pdf [file Figure_S5-C._albicans....pdf]
